# Supplementary material for: Natural and Pathological Autoantibodies Show Age-Related Changes in a Spontaneous Autoimmune Mouse (NZB) Model
Source: MDPI journal article supplement (doi:10.3390/ijms24129809), 2023-06-06
Supplement: s1 [file s1]

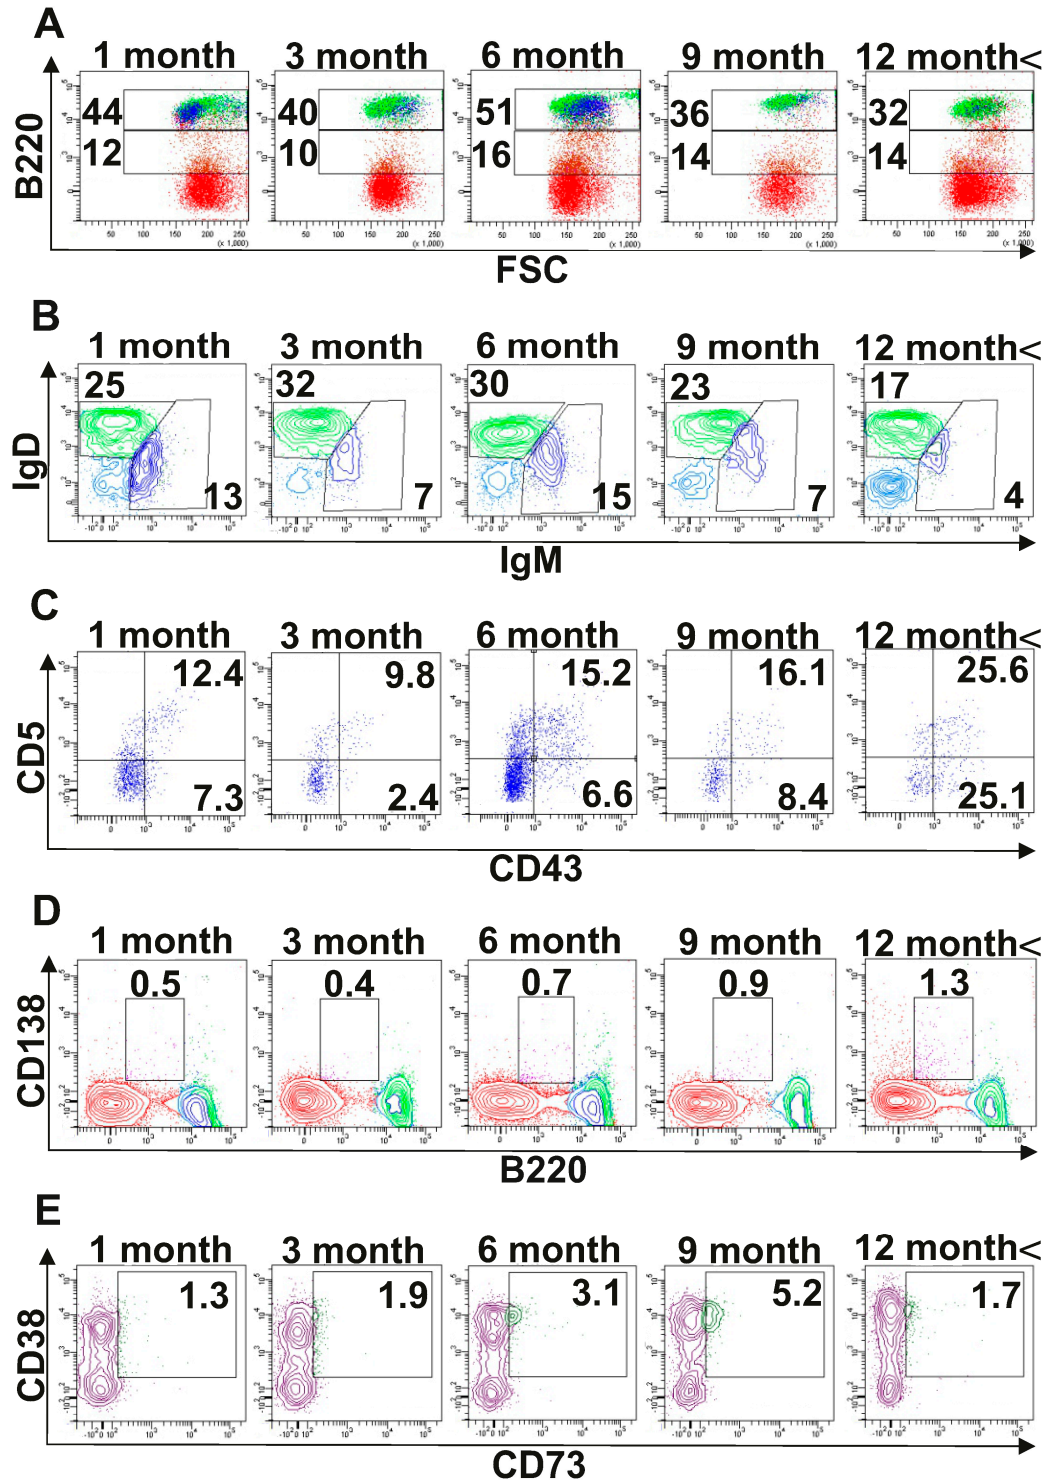

**Figure S1:** Flow cytometric analysis of the spleen cells isolated from NZB mice at different ages. **A:** Representative flow cytometric dot-plots show the distribution of cells based on their anti-B220 staining and FSC parameters. The numbers in the plots show the percentages of B220<sup>high</sup> and B220<sup>low</sup> cells, respectively. **B:** Representative contour plots show the distribution of cells based on their anti-IgD and anti-IgM staining. The numbers in the plots show the percentages of follicular (IgD<sup>high</sup>IgM<sup>low</sup>) and non-follicular (B1- and MZ B cells, IgD<sup>low</sup>IgM<sup>high</sup>) B cells indicated with green and dark blue colors, respectively. **C:** Representative dot plots show the distribution of cells based on their anti-CD5 and anti-CD43 staining. The numbers in the plots show the percentages of B1a (IgM<sup>high</sup>CD43<sup>+</sup>CD5<sup>+</sup>, upper right quadrant) and B1b cells (IgM<sup>high</sup>CD43<sup>+</sup>CD5<sup>-</sup>, lower right quadrant),

respectively. **D:** Representative contour plots show the distribution of cells based on their anti-CD138 and anti-B220 staining. The numbers in the plots show the percentages of plasmacells (B220<sup>low</sup>CD138<sup>+</sup>). **E:** Representative contour plots show the distribution of B220<sup>low</sup> cells (see panels **A**) based on their anti-CD38 and anti-CD73 staining. The numbers in the plots show the percentages of memory B cells (CD38<sup>+</sup>CD73<sup>+</sup>).
